# Supplementary material for: Subcutaneous Maturation of Neural Stem Cell-Loaded Hydrogels Forms Region-Specific Neuroepithelium
Source: PubMed Central journal article supplement (PMC6210402; doi:10.3390/cells7100173), 2018-10-17
Supplement: cells-07-00173-s001.pdf [file cells-07-00173-s001.pdf]

**Supplementary Materials:**

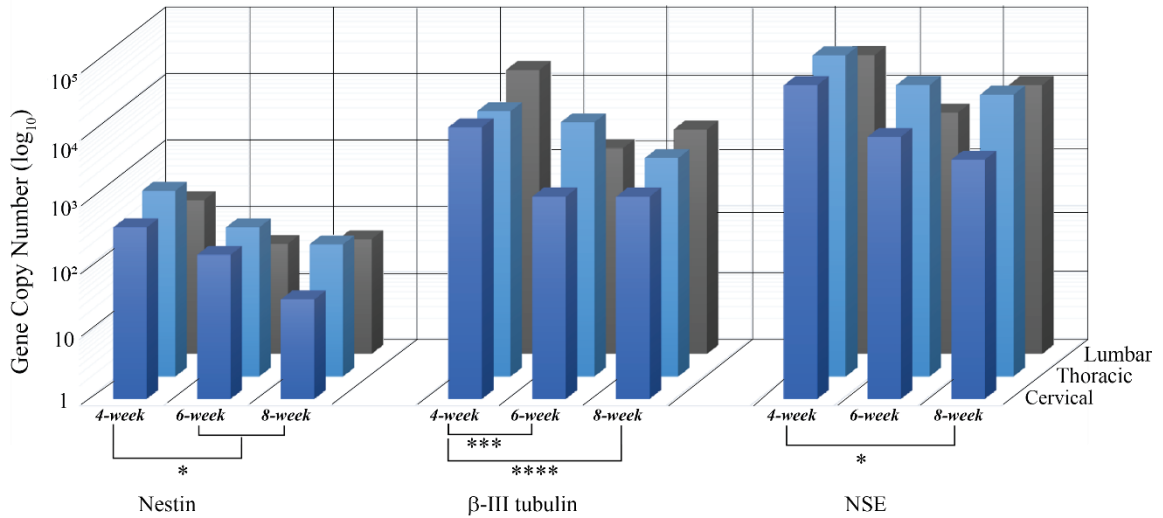

**Supplemental Figure 1.** aNSCs preferentially mature by 4 weeks as evident by gene expression. qPCR absolute quantification analysis of different genes from three different regions at each timepoint. Nestin expression was significantly different at 4 weeks as compared 6 and 8 weeks ( $p < 0.05$ ). β-III tubulin expression significantly decreased with longer implantation time as indicated by asterisks (asterisk represents significant difference as follow \*  $p < 0.05$ , \*\*\*  $p < 0.0001$ , \*\*\*\*  $p < 0.00001$ ). To the right, the figure shows significant differences in NSE expression between 4 and 8 weeks ( $p < 0.05$ ). Significance by two-way ANOVA, followed by post hoc Tukey HSD test. Mean with  $n = 3$ .

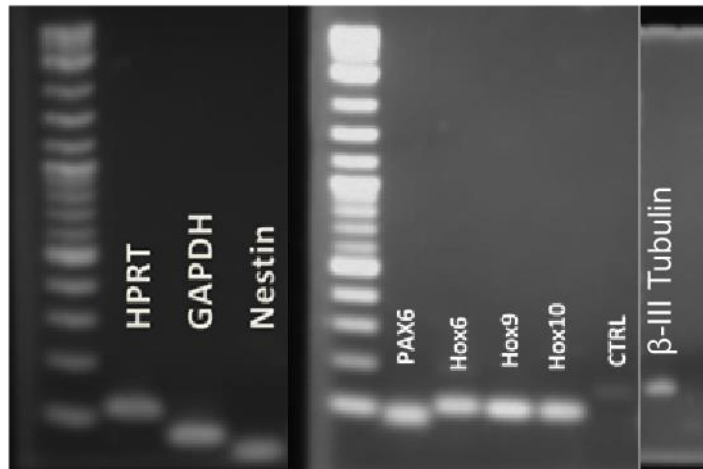

**Supplemental Figure 2.** Single PCR products were confirmed before cloning. Gel electrophoresis for conventional PCR products confirming that our target genes were amplified as a single product before starting cloning of these product.

**Supplemental Table 1.** Primer sets for genes used to characterize NSCs differentiation using absolute quantification.

| <i>Gene</i>          | <b>Forward Primer (5' – 3')</b>   | <b>Reverse Primer (5' – 3')</b>   |
|----------------------|-----------------------------------|-----------------------------------|
| <i>GAPDH</i>         | AGC TCA TTT CCT GGT ATG ACA A     | TAC TCC TTG GAG GCC ATG TA        |
| <i>HPRT</i>          | CTC ATG GAC TGA TTA TGG ACA GGA C | GCA GGT CAG CAA AGA ACT TAT AGC C |
| <i>β-III tubulin</i> | ACT TTA TCT TCG GTC AGA GTC       | CTC ACG ACA TCC AGG ACT GA        |
| <i>Nestin</i>        | GGC TAC ATA CAG GAC TCT G         | AAC CTC GTC CAG GTG TCT G         |
| <i>PAX6</i>          | GAA CTT GGA CGG GAA CTG AC        | CAA ACA CAC ATG AAC AGT CAG C     |
| <i>NSE</i>           | GAG AAC AGC GAA GCT TTG G         | AGC CAC ATC CAT ACC AAT CA        |
| <i>Nanog</i>         | CAA TGG ATG CTG GGA TAC TCC       | TTC TGA ACC TGA GCT ATA AGC AG    |
